# Supplementary material
Source: PubMed Central journal article supplement (PMC4815643)
Supplement: hdy201423x1.pdf [file hdy201423x1.pdf]

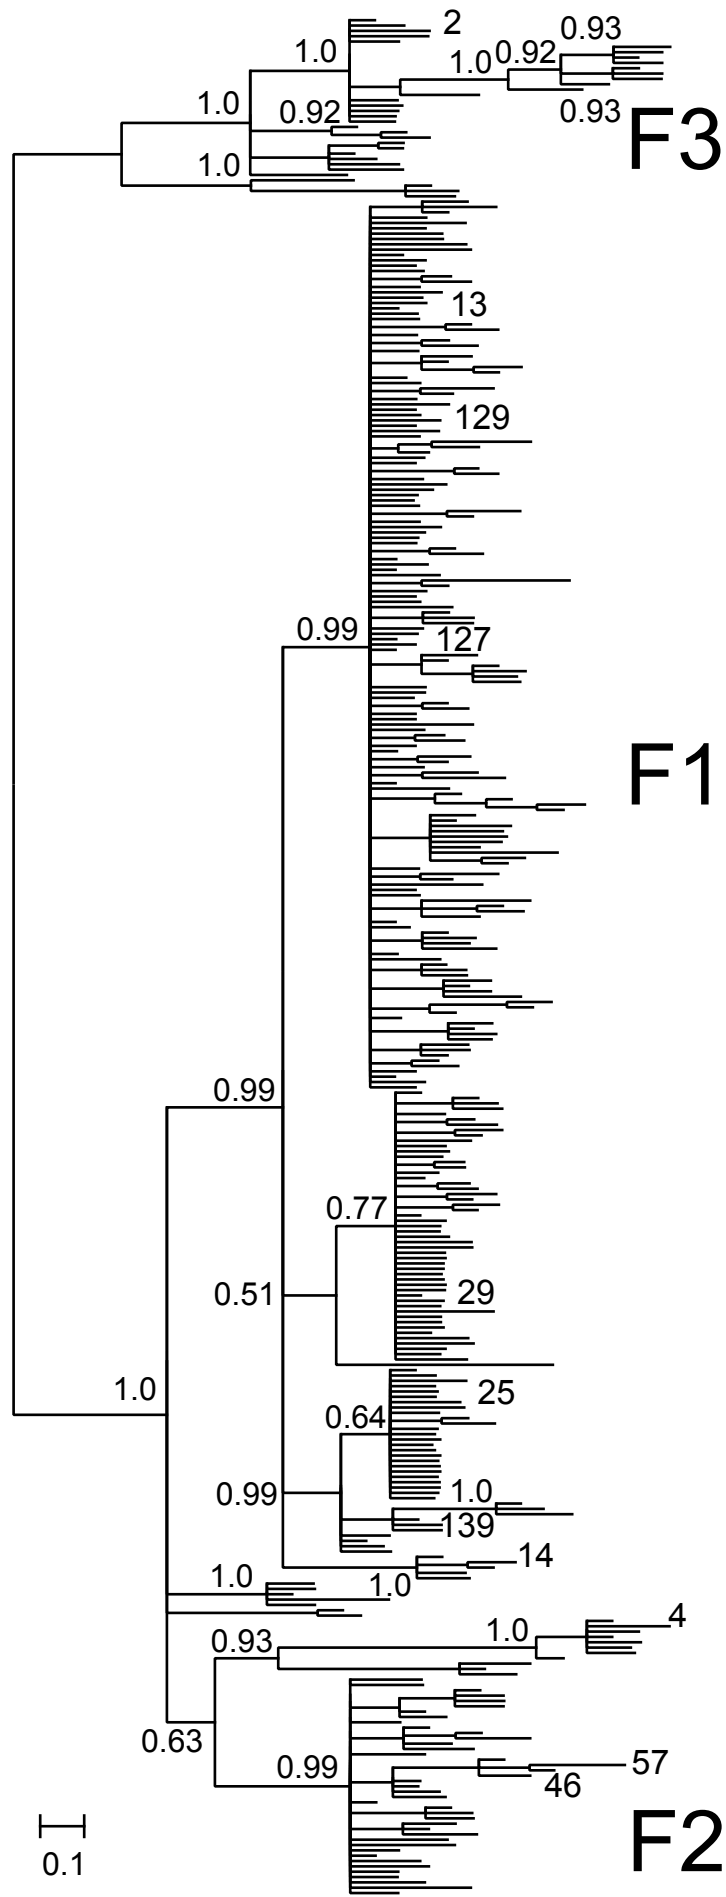

Supplementary figure1 Phylogenetic tree of all unique haplotypes, obtained by the Bayesian method. Posterior probabilities of bipartitions are shown for major clades only. The most frequent haplotypes are labeled.
