# Supplementary material
Source: PubMed Central journal article supplement (PMC4815643)
Supplement: hdy201423x2.pdf [file hdy201423x2.pdf]

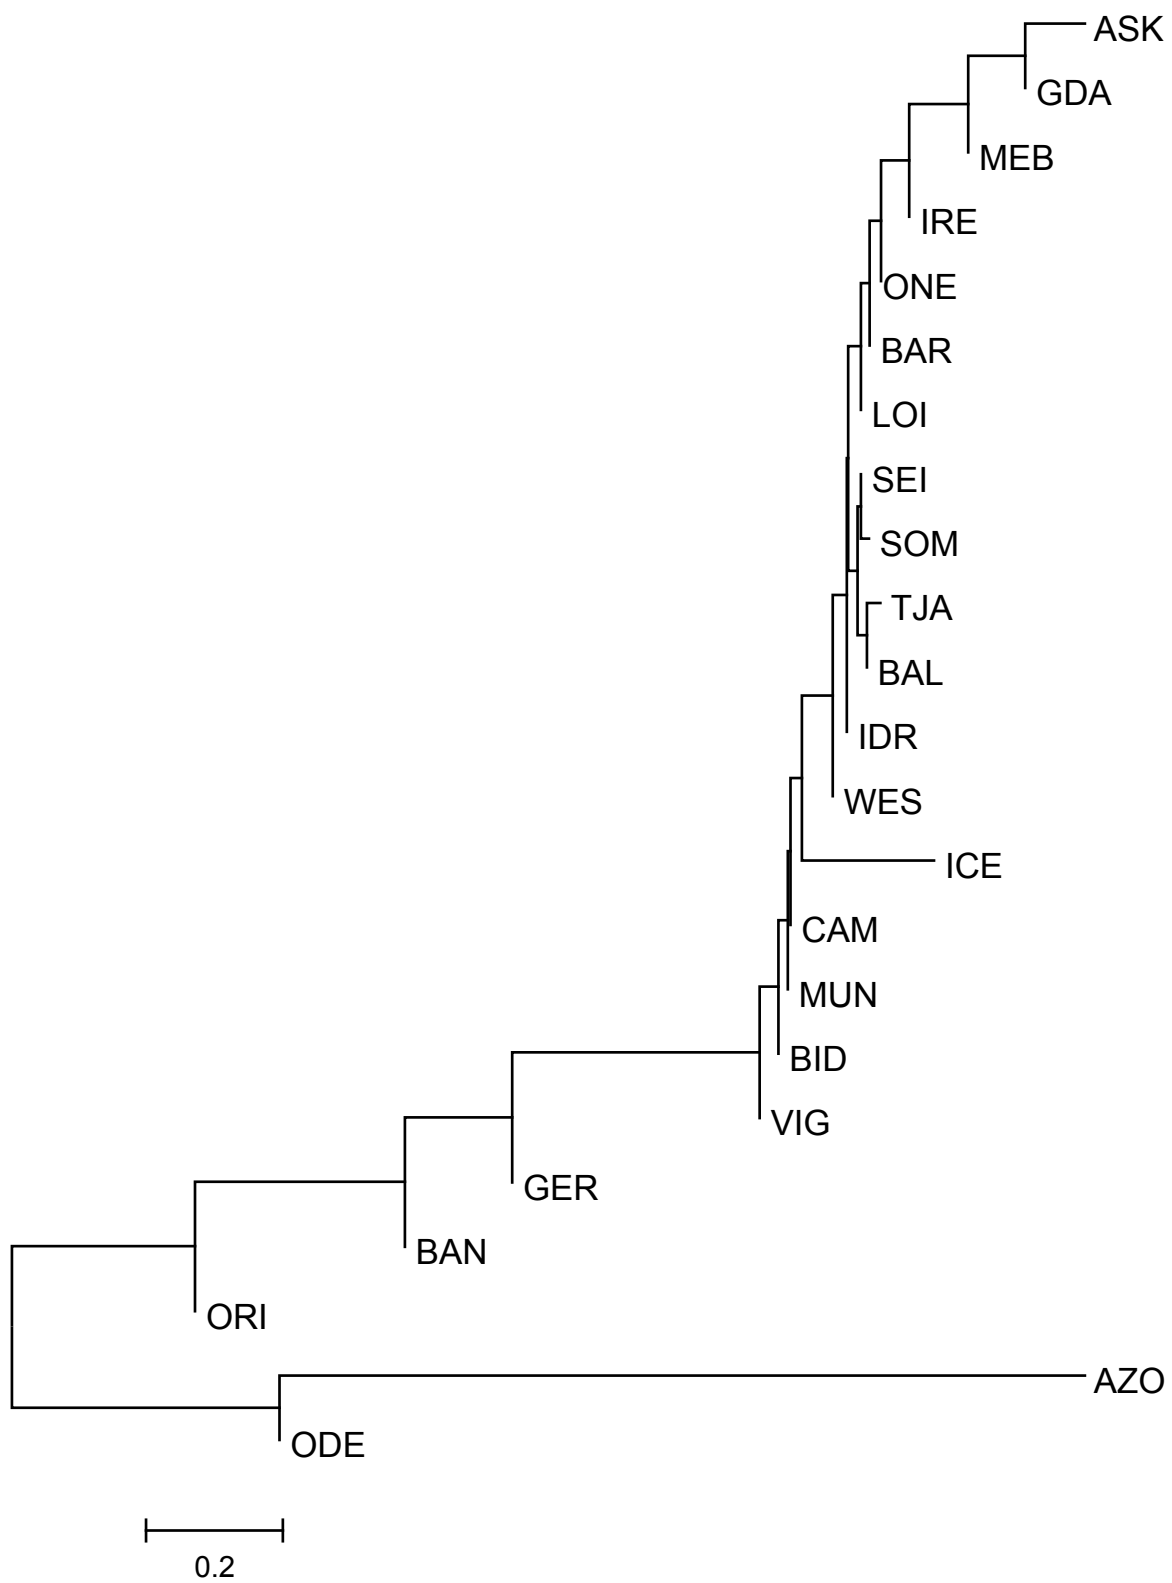

Supplementary figure2 Neighbor – joining tree of European populations based on Slatkin genetic distances.
