# Supplementary material
Source: PubMed Central journal article supplement (PMC4815643)
Supplement: hdy201423x3.pdf [file hdy201423x3.pdf]

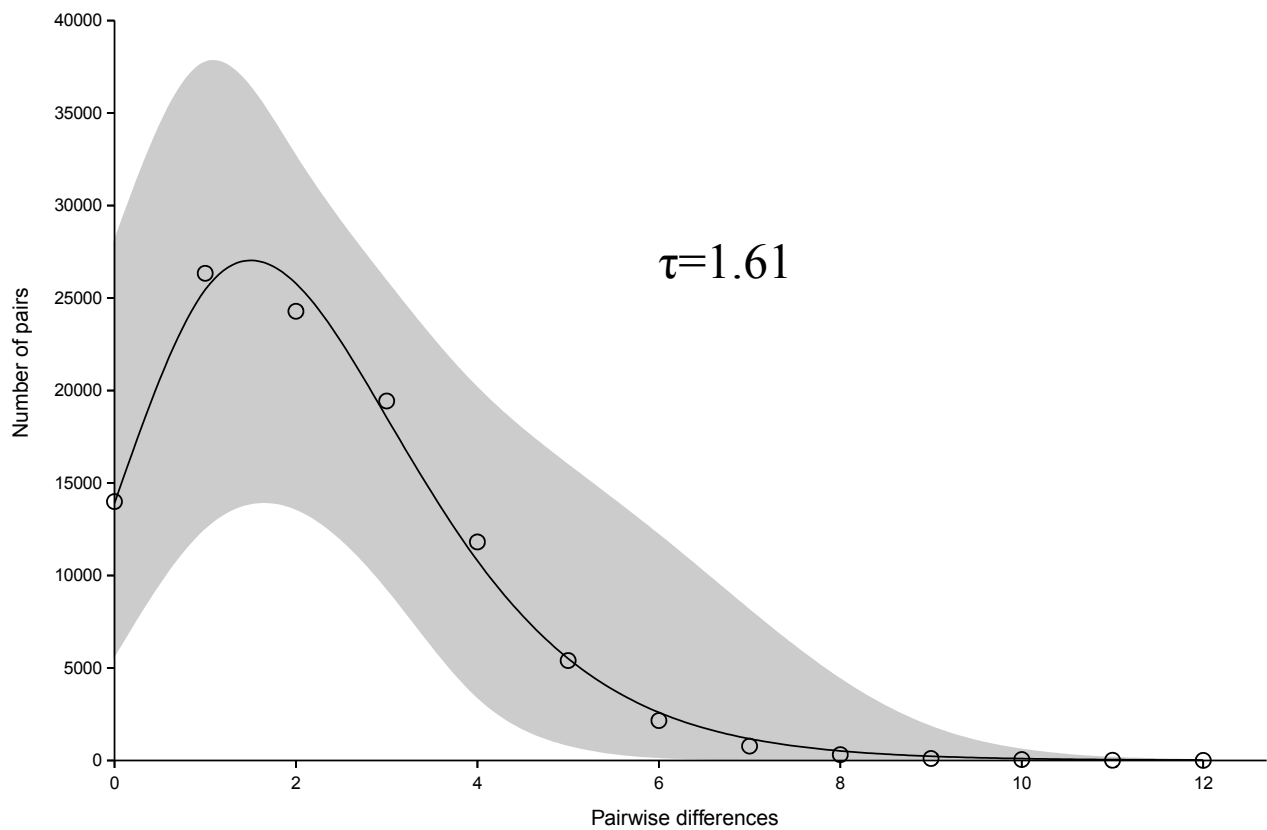

Supplementary figure 3 Mismatch analysis of the most abundant clade, represented by the group centered around the most frequent haplotypes: 13, 127 and 129. Open circles represent observed values, the line represents the values predicted by the model, gray area covers the 95% confidence interval.
