# Supplementary material
Source: PubMed Central journal article supplement (PMC4815643)
Supplement: hdy201423x4.pdf [file hdy201423x4.pdf]

**Supplementary Table 1.** Pairwise comparison of samples. Below diagonal are  $\Phi_{ST}$  values, corresponding numbers of migrants ( $Nm$ ) are above diagonal.

|     | ASK    | GDA    | MEB    | ONE    | BAR    | ICE    | IRE    | TJA    | BAL    | WES    | SOM    | SEI    | LOI    | IDR    | BID    | MUN    | VIG    | CAM    | GER    | BAN    | ORI    | ODE    | AZO  |
|-----|--------|--------|--------|--------|--------|--------|--------|--------|--------|--------|--------|--------|--------|--------|--------|--------|--------|--------|--------|--------|--------|--------|------|
| ASK |        | 23.14  | 10.19  | 2.81   | 2.33   | 0.49   | 5.66   | 1.29   | 1.74   | 2.51   | 1.79   | 1.96   | 3.59   | 2.85   | 1.36   | 1.32   | 1.11   | 1.35   | 0.53   | 0.58   | 0.64   | 0.24   | 0.07 |
| GDA | 0.021* |        | 22.82  | 6.47   | 12.39  | 0.79   | 13.23  | 2.01   | 2.93   | 4.23   | 2.99   | 3.58   | 8.25   | 5.24   | 1.98   | 1.99   | 1.57   | 2.04   | 0.69   | 0.73   | 0.78   | 0.29   | 0.10 |
| MEB | 0.047* | 0.021  |        | 7.14   | 122.51 | 1.09   | 12.06  | 3.69   | 4.66   | 5.96   | 4.20   | 5.61   | 10.07  | 7.92   | 2.19   | 2.31   | 1.79   | 2.34   | 0.80   | 0.83   | 0.88   | 0.32   | 0.12 |
| ONE | 0.151* | 0.072* | 0.065* |        | inf    | 2.16   | 93.32  | 3.98   | 6.18   | 17.50  | 6.23   | 11.58  | 335.24 | 22.03  | 6.16   | 7.01   | 4.35   | 7.85   | 1.07   | 1.11   | 1.15   | 0.40   | 0.14 |
| BAR | 0.177* | 0.039  | 0.004  | -0.023 |        | 1.81   | inf    | 11.08  | 39.21  | inf    | 18.34  | inf    | inf    | inf    | 5.48   | 5.72   | 4.29   | 6.52   | 1.72   | 1.66   | 1.61   | 0.54   | 0.15 |
| ICE | 0.505* | 0.389* | 0.314* | 0.188* | 0.216* |        | 1.88   | 1.50   | 1.67   | 2.80   | 1.64   | 2.08   | 2.31   | 2.71   | 2.18   | 2.21   | 2.19   | 2.69   | 0.73   | 0.81   | 0.85   | 0.32   | 0.11 |
| IRE | 0.081* | 0.036* | 0.039* | 0.005  | -0.028 | 0.210* |        | 3.09   | 4.65   | 10.91  | 5.10   | 8.00   | 28.24  | 11.89  | 3.27   | 3.51   | 2.56   | 3.83   | 0.89   | 0.93   | 0.96   | 0.36   | 0.13 |
| TJA | 0.280* | 0.199* | 0.119* | 0.112* | 0.043  | 0.249* | 0.139* |        | 56.11  | 10.04  | 8.69   | 13.63  | 8.71   | 20.35  | 3.24   | 3.35   | 3.15   | 3.31   | 2.15   | 2.07   | 2.02   | 0.59   | 0.22 |
| BAL | 0.223* | 0.146* | 0.097* | 0.075* | 0.013  | 0.230* | 0.097* | 0.009  |        | 36.89  | 77.85  | inf    | 14.12  | 86.36  | 3.75   | 3.83   | 3.42   | 3.79   | 2.06   | 1.98   | 1.95   | 0.59   | 0.23 |
| WES | 0.166* | 0.106* | 0.077* | 0.028* | -0.010 | 0.151* | 0.044* | 0.047* | 0.013  |        | 31.33  | 62.66  | 44.27  | 75.88  | 5.28   | 6.02   | 4.42   | 6.11   | 1.35   | 1.37   | 1.38   | 0.48   | 0.19 |
| SOM | 0.218* | 0.143* | 0.106* | 0.074* | 0.027  | 0.234* | 0.089* | 0.054* | 0.006  | 0.016* |        | inf    | 11.67  | 16.42  | 3.37   | 3.49   | 2.95   | 3.45   | 1.39   | 1.40   | 1.40   | 0.48   | 0.19 |
| SEI | 0.203* | 0.123* | 0.082* | 0.041* | -0.007 | 0.194* | 0.059* | 0.035  | -0.003 | 0.008  | -0.000 |        | 30.18  | 311.53 | 4.33   | 4.58   | 3.65   | 4.62   | 1.50   | 1.50   | 1.49   | 0.49   | 0.19 |
| LOI | 0.122* | 0.057* | 0.047* | 0.001  | -0.033 | 0.178* | 0.017  | 0.054* | 0.034* | 0.011  | 0.041* | 0.016  |        | inf    | 5.98   | 6.75   | 4.55   | 7.15   | 1.35   | 1.36   | 1.38   | 0.47   | 0.19 |
| IDR | 0.149* | 0.087* | 0.059* | 0.022  | -0.026 | 0.156* | 0.040* | 0.024  | 0.006  | 0.007  | 0.029* | 0.002  | -0.006 |        | 5.59   | 6.20   | 4.70   | 6.36   | 1.67   | 1.64   | 1.65   | 0.53   | 0.22 |
| BID | 0.268* | 0.202* | 0.186* | 0.075* | 0.084* | 0.187* | 0.133* | 0.134* | 0.118* | 0.086* | 0.129* | 0.104* | 0.077* | 0.082* |        | inf    | inf    | inf    | 1.58   | 1.66   | 1.67   | 0.51   | 0.24 |
| MUN | 0.275* | 0.201* | 0.178* | 0.067* | 0.080* | 0.184* | 0.125* | 0.129* | 0.115* | 0.077* | 0.125* | 0.098* | 0.069* | 0.075* | -0.009 |        | inf    | inf    | 1.35   | 1.42   | 1.46   | 0.46   | 0.20 |
| VIG | 0.311* | 0.241* | 0.219* | 0.103* | 0.104* | 0.186* | 0.163* | 0.137* | 0.128* | 0.102* | 0.145* | 0.120* | 0.099* | 0.096* | -0.010 | -0.005 |        | inf    | 1.77   | 1.85   | 1.89   | 0.56   | 0.26 |
| CAM | 0.269* | 0.197* | 0.176* | 0.059* | 0.071  | 0.157* | 0.116* | 0.131* | 0.117* | 0.076* | 0.127* | 0.098* | 0.065* | 0.073* | -0.012 | -0.013 | -0.008 |        | 1.46   | 1.54   | 1.58   | 0.49   | 0.22 |
| GER | 0.485* | 0.419* | 0.384* | 0.319* | 0.225* | 0.406* | 0.359* | 0.189* | 0.195* | 0.269* | 0.265* | 0.249* | 0.269* | 0.229* | 0.240* | 0.271* | 0.221* | 0.255* |        | inf    | inf    | 1.35   | 0.83 |
| BAN | 0.462* | 0.405* | 0.375* | 0.310* | 0.231* | 0.381* | 0.351* | 0.194* | 0.202* | 0.268* | 0.263* | 0.249* | 0.268* | 0.233* | 0.231* | 0.261* | 0.213* | 0.245* | -0.017 |        | inf    | 1.46   | 0.90 |
| ORI | 0.440* | 0.389* | 0.363* | 0.304* | 0.237* | 0.369* | 0.342* | 0.199* | 0.204* | 0.266* | 0.263* | 0.250* | 0.265* | 0.233* | 0.229* | 0.255* | 0.209* | 0.241* | -0.019 | -0.009 |        | 1.39   | 0.99 |
| ODE | 0.677* | 0.631* | 0.609* | 0.554* | 0.483* | 0.609* | 0.583* | 0.459* | 0.461* | 0.509* | 0.510* | 0.506* | 0.515* | 0.487* | 0.493* | 0.519* | 0.473* | 0.501* | 0.270* | 0.255* | 0.264* |        |      |
| AZO | 0.874* | 0.829* | 0.805* | 0.777* | 0.766* | 0.819* | 0.795* | 0.697* | 0.682* | 0.716* | 0.723* | 0.727* | 0.728* | 0.691* | 0.677* | 0.713* | 0.660* | 0.698* | 0.377* | 0.357* | 0.334* | 0.417* |      |

\*  $p < 0.001$  after Bonferroni correction
